# Supplementary material
Source: Springer Nature journal article supplement (https://www.springermedizin.de/resource/supplementary/12884_2012_607_MOESM10_ESM.pdf/9457810)

# ZFPC1

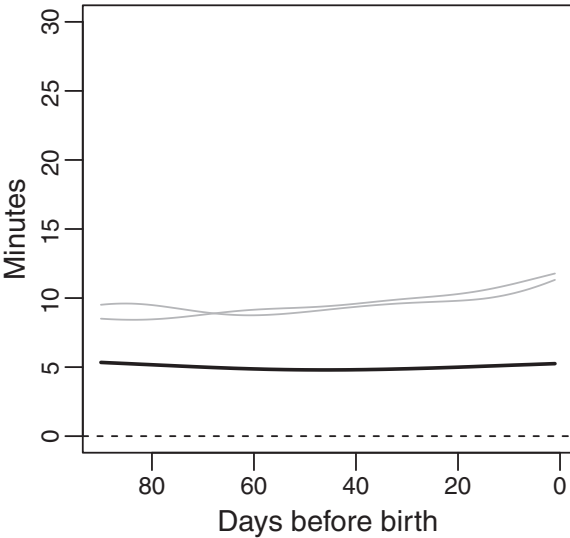

Supplement: MOESM10 [file 9457810]
